# Supplementary material
Source: Springer Nature journal article supplement (https://www.springermedizin.de/resource/supplementary/12874_2011_813_MOESM5_ESM.pdf/9432906)

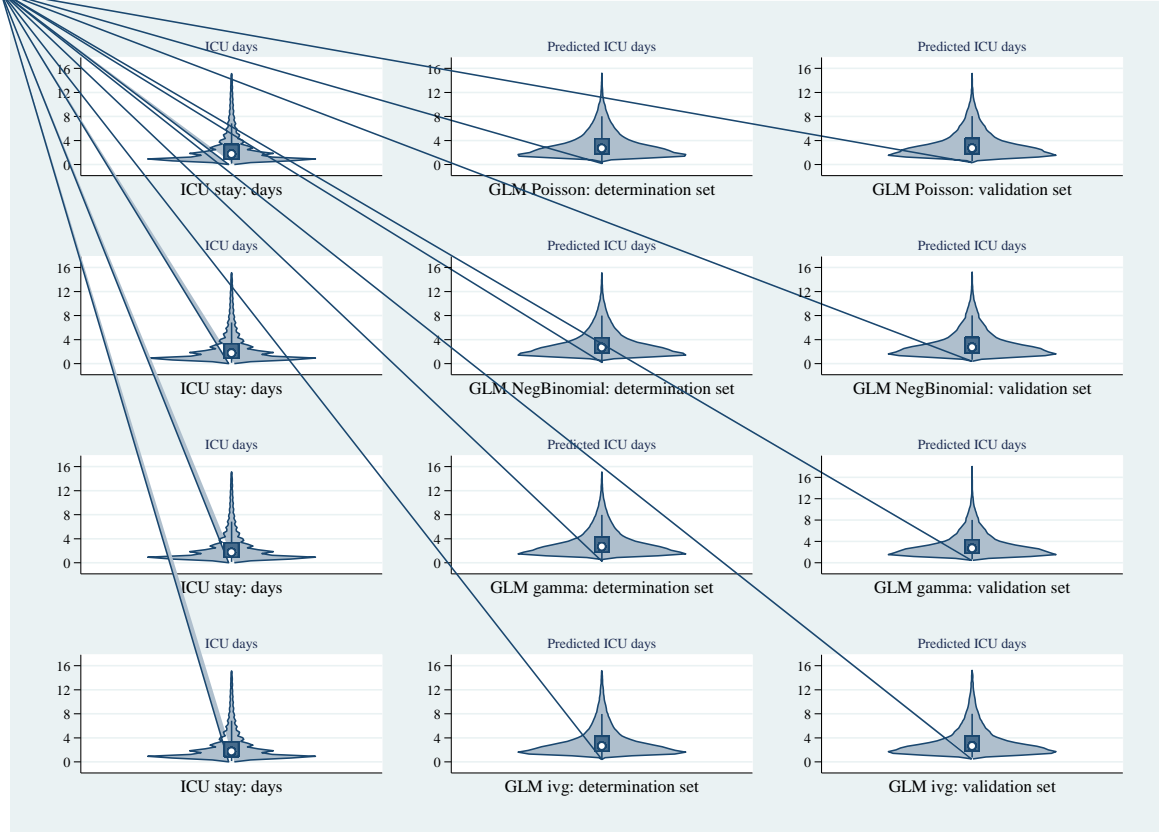

GLM Poisson-log: determination

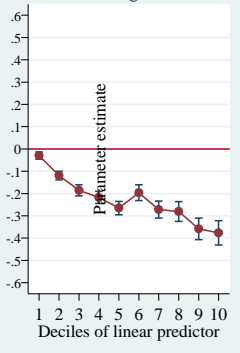

GLM Poisson-log: validation

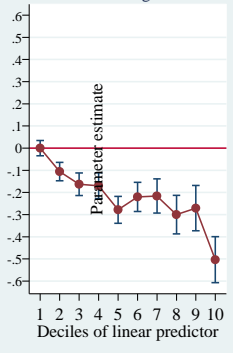

GLM NegBinomial-log: determination

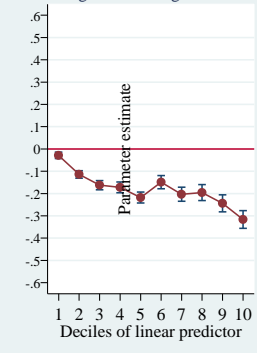

GLM NegBinomial-log: validation

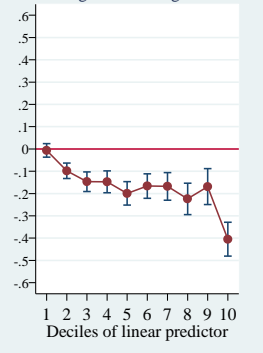

GLM Gamma-log: determination

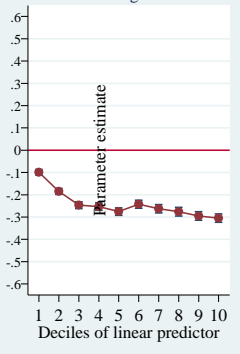

GLM Gamma-log: validation

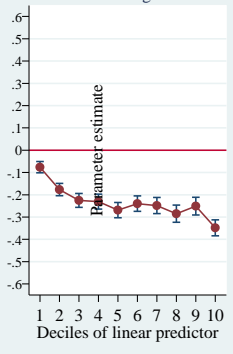

GLM IVG-log: determination

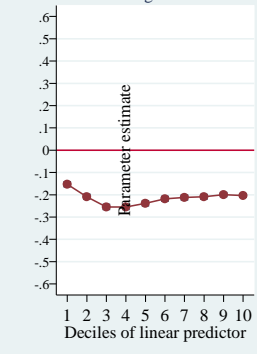

GLM IVG-log: validation

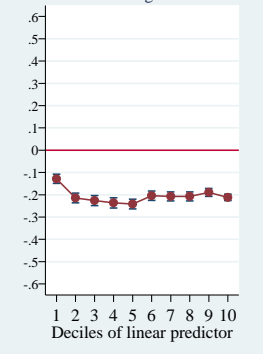

Supplement: MOESM5 [file 9432906]
